# Supplementary material for: Study on the Frying Performance Evaluation of Refined Soybean Oil after PLC Enzymatic Degumming
Source: MDPI journal article supplement (doi:10.3390/foods13020275), 2024-01-16
Supplement: s1 [file s1]

Table S1. Soybean oil refining process and main parameters

| Process           |                      | Parametres                                  | ED-L    | WD-L    |
|-------------------|----------------------|---------------------------------------------|---------|---------|
|                   |                      | Oil weight (g)                              | 700     | 700     |
| Water degumming   |                      | Water dosage (%)                            |         | 3%      |
|                   |                      | Temperature (° C)                           |         | 85      |
|                   |                      | Time (min)                                  |         | 20      |
| PLC degumming     | Citric acid addition | Citric acid monohydrate concentration (w/w) | 50      |         |
|                   |                      | Citric acid monohydrate solution dosage (g) | 0.56    |         |
|                   |                      | High shear mixer, 10,000 rpm time (min)     | 2       |         |
|                   |                      | Overhead mixer time (min)                   | 30      |         |
|                   | Cooling              | Temperature (° C)                           | 60      |         |
|                   | NaOH addition        | NaOH solution (w/w, %)                      | 16      |         |
|                   |                      | NaOH solution dosage (g)                    | 0.875   |         |
|                   |                      | Agitation time (min)                        | 30      |         |
|                   |                      | Water dosage (g)                            | 12.46   |         |
|                   |                      | PLC dosage (g)                              | 0.105   |         |
|                   |                      | High shear mixer, 10,000 rpm time (min)     | 2       |         |
|                   | Enzyme reaction      | Temperature (° C)                           | 55      |         |
|                   |                      | Time (min)                                  | 120     |         |
|                   | Deactivation         | Temperature (° C)                           | 85      |         |
| Centrifuge        |                      | Temperature (° C)                           | 85      | 85      |
|                   |                      | Centrifuge strength (G)                     | 4000    | 4000    |
|                   |                      | Centrifuge time (min)                       | 15      | 15      |
| Chelation         |                      | Oil temperature (° C)                       |         | 85      |
|                   |                      | Phosphoric acid concentration (w/w, %)      |         | 85      |
|                   |                      | Phosphoric acid dosage (g)                  |         | 0.133   |
|                   |                      | Agitation time (min)                        |         | 10      |
| Neutralization    |                      | NaOH solution concentration (w/w, %)        |         | 7.3     |
|                   |                      | NaOH solution dosage (g)                    |         | 9.24    |
|                   |                      | High Shear Mixer, 10,000 rpm time (min)     |         | 10      |
| Drying& Bleaching |                      | Vacuum (mbar)                               | 100     | 100     |
|                   |                      | Bleaching earth dosage (%)                  | 1.5     | 1.5     |
|                   |                      | Active carbon dosage (%)                    | 0.1     | 0.1     |
|                   |                      | Time (min)                                  | 30      | 30      |
|                   |                      | Temperature (° C)                           | 105     | 105     |
| Deodorization     |                      | Temperature (° C)                           | 240-245 | 240-245 |
|                   |                      | Time (min)                                  | 120     | 120     |
|                   |                      | Vacuum (mbar)                               | 5-10    | 5-10    |
